# Supplementary material
Source: PubMed Central journal article supplement (PMC4713904)
Supplement: NIHMS64209-supplement-01.pdf [file NIHMS64209-supplement-01.pdf]

SUPPLEMENTARY DATA

**Supplementary Table 1. PCR amplification and sequencing primers used for Sanger sequencing of human *PPP1R15B* gene**

| Region amplified    | Chromosome 1 map position <sup>a</sup> |           | PCR amplification and sequencing primer (5'-3') |                         |                             | Product Size (bp) |
|---------------------|----------------------------------------|-----------|-------------------------------------------------|-------------------------|-----------------------------|-------------------|
|                     | Start                                  | End       | Forward                                         | Reverse                 | Internal sequencing primers |                   |
| Promoter            | 204380800                              | 204381633 | CTCGACGCTTCAACACCA                              | GGGCATTCAACCTTCCAT      |                             | 834               |
| Exon 1              | 204380426                              | 204381021 | CGTCGGGAACCTTAGAAGAGC                           | GACGTAGACGCCCAACAGTC    |                             | 596               |
| Exon 1              | 204379845                              | 204380621 | GGAAAGCAGTCCAGGTAGGA                            | TCTGTAGGCTTCTCCGAAT     |                             | 777               |
| Exon 1              | 204379186                              | 204379984 | CTCCTCATCCCAATCCTCA                             | TTGCCCAGTAGCCTTCAATC    |                             | 799               |
| Exon 1              | 204378537                              | 204379351 | AAGCCTCCAAAGTCATGCTG                            | GGAGAGGGCCGAATAAGTGT    |                             | 815               |
| Intron <sup>b</sup> | 204376192                              | 204377016 | AATAACCACTATATCCCTGGAAGTC                       | CCTTTGACTACCTGCCATTG    |                             | 825               |
| Exon 2              | 204375199                              | 204375499 | CTAGGACTACAGGCTGCCAAC                           | CCTCAATGCTGATTGTAAGATCC |                             | 301               |
| Exon 2              | 204374565                              | 204375305 | TTGTGGCAGTCCTTGAAAT                             | GCTTGACATTTGAACACAGAGA  |                             | 741               |
| Exon 2              | 204374234                              | 204374967 | TGACAGTGCTGAGGCATGAT                            | ATGTCCTTGCCTGCATGA      |                             | 734               |
| Exon 2              | 204373791                              | 204374484 | CCCTGTAAGCACTTCTGATGA                           | TTTGAAGAGGGTTCTGTGTACG  |                             | 694               |
| Exon 2              | 204372956                              | 204373998 | TCCTTCTGTCTTCTTATCACC                           | GCATTGACTGTTTGTGTTGG    | CAGCTTGGAGTGCAGTGG          | 1043              |
| Exon 2              | 204372325                              | 204373064 | AAAGCTAGGGCCAATTCAG                             | TGGGATTCTAACCTCACTACCAA |                             | 740               |

<sup>a</sup>Map position on hg19 reference sequence. <sup>b</sup>This intronic region was selected as potentially functionally relevant to *PPP1R15B* because it shows species conservation and includes non-spliced human ESTs.

SUPPLEMENTARY DATA

**Supplementary Table 2. siRNA sequences**

| siRNA    | Sequence                  | Company    | Validated in |
|----------|---------------------------|------------|--------------|
| P1R15B 1 | GACUUACUGUUGUACAGCATT     | Invitrogen |              |
| P1R15B 2 | AAGGGAUGGAUGCAGGUUCCA     |            | (1)          |
| DP5      | UCACAGUUUCUUGGUGCUAAGUGUA | Invitrogen | (2)          |
| PUMA     | ACGAGCGGCGGAGACAAGAAGAGCA | Invitrogen | (3)          |
| Bim      | CGAGGAGGGCGUUUGCAAACGAUUA | Invitrogen | (3)          |

**Supplementary Table 3. Primer sequences used for mRNA expression studies**

| Gene     | STD/RT <sup>a</sup> | Forward             | Reverse               | Size |
|----------|---------------------|---------------------|-----------------------|------|
| PPP1R15B | STD                 | AGGCAGTCAGGCATCCTCT | TCAAGTAAGAGATGGAGTGGG | 431  |
|          | RT                  | TGGGTGAGGCACTTTCTGG | TGGCGACTTCTGTTTCCTG   | 177  |
| GAPDH    | STD                 | ATGACTCTACCCACGGCAA | TGTGAGGGAGATGCTCAGTG  | 930  |
|          | RT                  | AGTTCAACGGCACAGTCAA | TACTCAGCACCAGCATCACC  | 136  |
| DP5      | STD                 | GCACCCTGTGACCTTCTA  | TCACATGCACGAACACACAC  | 550  |
|          | RT                  | GCCGTGGTGTACTTGGAC  | GATTGTGCCAGAGCTTCACA  | 125  |
| PUMA     | STD                 | TGGGTGCACTGATGGAGA  | AACCTATGCAATGGGATGGA  | 497  |
|          | RT                  | AGTGCGCCTTCACTTTGG  | CAGGAGGCTAGTGGTCAGGT  | 109  |

<sup>a</sup> STD: Standard, RT: Real time

**Supplementary Table 4. Filtering of variants identified by whole exome sequencing of patient 1 (index patient)**

| Filter                                 | Patient 1 |
|----------------------------------------|-----------|
| All variants                           | 55298     |
| Homozygous variants <sup>a</sup>       | 19591     |
| Coding-affecting variants <sup>b</sup> | 3934      |
| Rare Variants <sup>c</sup>             | 18        |

Counts are the number of autosomal variants (SNVs and insertion/deletion variants (indels)) identified by Whole Exome Sequencing of the patient compared to the Human Reference Genome on UCSC build hg19. The successive filters applied after quality filtering are shown: <sup>a</sup>homozygous variants, <sup>b</sup>nonsynonymous variants including missense and nonsense, splice-site variants and exonic indels (frameshift and non-shifted), <sup>c</sup>variants that were absent in the homozygous status in an in-house database, in Exome Variant Server (EVS) and in Exome Aggregation Consortium (ExAC) and with a MAF < 0.005 in these databases and in dbSNP.

SUPPLEMENTARY DATA

**Supplementary Table 5. Description of the 18 rare variants identified by whole exome sequencing in patient 1, and complementary genotyping of these variants in patient 2**

| Map position                | Gene         | cDNA RefSeq      | cDNA change         | Protein RefSeq   | Protein change      | rs number          | EVS heterozygous count/total (frequency) | EVS MAF        | ExAC heterozygous count/total (frequency) | ExAC MAF       | Genotype Patients |            |
|-----------------------------|--------------|------------------|---------------------|------------------|---------------------|--------------------|------------------------------------------|----------------|-------------------------------------------|----------------|-------------------|------------|
|                             |              |                  |                     |                  |                     |                    |                                          |                |                                           |                | 1                 | 2          |
| chr1:150532595G>A           | ADAMTSL4     | NM_019032        | c.3384G>A           | NP_061905        | p.Val1050Ile        | rs201941243        | Absent                                   | 0              | 9/60664 (0.00015)                         | 0.00007        | 2/2               | 2/2        |
| chr1:152285138A>G           | FLG          | NM_002016        | c.2262T>C           | NP_002007        | p.Ser742Pro         | NA                 | Absent                                   | 0              | 2/60705 (0.00003)                         | 0.00002        | 2/2               | 2/2        |
| chr1:200972760C>A           | KIF21B       | NM_017596        | c.1485G>T           | NP_060066        | p.Arg389Leu         | NA                 | Absent                                   | 0              | Absent                                    | 0              | 2/2               | 2/2        |
| chr1:204375390G>A           | PPP1R15B     | NM_032833        | c.2379C>T           | NP_116222        | p.Arg658Cys         | NA                 | Absent                                   | 0              | Absent                                    | 0              | 2/2               | 2/2        |
| chr1:205632155G>A           | SLC45A3      | NM_033102        | c.1105C>T           | NP_149093        | p.Ala255Val         | rs142713511        | <b>3/6492 (0.00046)</b>                  | <b>0.00023</b> | <b>19/57327 (0.00033)</b>                 | <b>0.00017</b> | <b>2/2</b>        | <b>2/2</b> |
| chr10:79601934T>C           | DLG5         | NM_004747        | c.1214A>G           | NP_004738        | p.His381Arg         | rs150885638        | 9/6503 (0.0014)                          | 0.00069        | 68/60227 (0.0011)                         | 0.00056        | 2/2               | 1/2        |
| chr11:6646598C>T            | DCHS1        | NM_003737        | c.7380G>A           | NP_003728        | p.Arg2326His        | NA                 | Absent                                   | 0              | 1/60150 (0.00002)                         | 0.00001        | 2/2               | 1/2        |
| chr16:1719068C>T            | CRAMP1L      | NM_020825        | c.3401C>T           | NP_065876        | p.Pro1134Leu        | NA                 | Absent                                   | 0              | 2/55044 (0.00004)                         | 0.00002        | 2/2               | 1/2        |
| chr16:1967936T>C            | HS3ST6       | NM_001009606     | c.298A>G            | NP_001009606     | p.Thyr99Cys         | NA                 | Absent                                   | 0              | Absent                                    | 0              | 2/2               | 1/2        |
| chr16:2816615 G>A           | SRRM2        | NM_016333        | c.6635G>A           | NP_057417        | p.Arg2029His        | NA                 | Absent                                   | 0              | 6/60547 (0.00010)                         | 0.00005        | 2/2               | 1/2        |
| chr18:8784555C>T            | MTCL1        | NM_015210        | c.1587C>T           | NP_056025        | p.Ala482Val         | rs115077293        | 13/6502 (0.0020)                         | 0              | 57/56978 (0.0010)                         | 0.00050        | 2/2               | 1/2        |
| chr19:2807595C>T            | THOP1        | NM_003249        | c.1197C>T           | NP_003240        | p.Arg348Cys         | NA                 | Absent                                   | 0              | 3/58471 (0.00005)                         | 0.00003        | 2/2               | 1/2        |
| chr19:2851553C>T            | ZNF555       | NM_152791        | c.356C>T            | NP_001166246     | p.Thr73Met          | rs369544612        | 2/6503 (0.00031)                         | 0              | 8/60476 (0.00013)                         | 0.00007        | 2/2               | 1/2        |
| <b>chr2:210742714G&gt;C</b> | <b>UNC80</b> | <b>NM_032504</b> | <b>c.3963G&gt;C</b> | <b>NP_115893</b> | <b>p.Glu1295Gln</b> | <b>rs187089611</b> | <b>Absent</b>                            | <b>0</b>       | <b>4/10840 (0.00037)</b>                  | <b>0.00018</b> | <b>2/2</b>        | <b>2/2</b> |
| chr3:133474254A>G           | TF           | NM_001063        | c.858A>G            | NP_001054        | p.Thr184Ala         | rs139768770        | 3/6503 (0.00046)                         | 0.00023        | 14/60704 (0.00023)                        | 0.00012        | 2/2               | 1/2        |
| chr3:133647257A>G           | C3orf36      | NM_025041        | c.1402T>C           | NP_079317        | p.Ser131Pro         | rs149002991        | 1/6503 (0.00015)                         | 0.00008        | 4/60232 (0.00007)                         | 0.00003        | 2/2               | 1/2        |
| chr5 :169310284C>A          | FAM196B      | NM_001129891     | c.2003G>T           | NP_001123363     | p.Asp207Tyr         | rs200832892        | Absent                                   | 0              | 15/10832 (0.0014)                         | 0.00069        | 2/2               | 1/2        |
| chr8 :23560457A>G           | NKX2-6       | NM_001136271     | c.226T>C            | NP_001129743     | p.Leu56Pro          | NA                 | Absent                                   | 0              | Absent                                    | 0              | 2/2               | 1/2        |

Genomic map position is on UCSC hg19. Description of the consequences on cDNA and protein follows the Human Genome Variation Society (HGVS) recommendations (4). Heterozygotes and total genotype counts, heterozygotes frequencies, and minor allele frequencies (MAF) are given for EVS and ExAC. All the variants were absent in the homozygous status in these databases. The genotype of the two affected siblings is shown as 2/2 (homozygous for the rare allele), 1/2 (heterozygous) and 1/1 (homozygous for the frequent allele, none found). Variants homozygous in both patients are shown in bold. NA: not available.

SUPPLEMENTARY DATA

**Supplementary Table 6. Functional predictions of the variants compatible with mutation status and human mutations and knockout mouse phenotypes of the corresponding genes**

| Gene            | Name                                          | Protein RefSeq | Protein change | Polyphen (score)          | Provean (score)     | SIFT (score)      | Monogenic disease (mode of inheritance)                    | Knockout mouse model (homozygous)                        | Human islet expression (RPKM) <sup>a</sup> |
|-----------------|-----------------------------------------------|----------------|----------------|---------------------------|---------------------|-------------------|------------------------------------------------------------|----------------------------------------------------------|--------------------------------------------|
| <b>ADAMTSL4</b> | ADAMTS-like 4                                 | NP_061905      | p.Val1050Ile   | Probably damaging (1)     | Neutral (-0.69)     | Damaging (0.014)  | Ectopia lentis (autosomal recessive) (5)                   | NA                                                       | 1.6                                        |
| <b>FLG</b>      | filaggrin                                     | NP_002007      | p.Ser742Pro    | Benign (0.018)            | Neutral (-1.77)     | Tolerated (0.201) | Atopic dermatitis, ichthyosis vulgaris (semi-dominant) (6) | Atopic dermatitis (7)                                    | 0.9                                        |
| <b>KIF21B</b>   | kinesin family member 21B                     | NP_060066      | p.Arg389Leu    | Probably damaging (0.998) | Deleterious (-6.29) | Damaging (0.001)  | Not reported                                               | Cellular phenotype : chromosome instability <sup>a</sup> | 0.7                                        |
| <b>PPP1R15B</b> | protein phosphatase 1, regulatory subunit 15B | NP_116222      | p.Arg658Cys    | Probably damaging (1)     | Deleterious (-7.48) | Damaging (0.000)  | Not reported                                               | Post-natal lethal, extremely small size (4)              | 12.1                                       |
| <b>SLC45A3</b>  | solute carrier family 45, member 3            | NP_149093      | p.Ala255Val    | Benign (0.015)            | Neutral (-1.11)     | Tolerated (0.169) | Not reported                                               | NA                                                       | 3.1                                        |
| <b>UNC80</b>    | Ung-80 homolog (C. elegans)                   | NP_115893      | p.Glu1295Gln   | Possibly damaging (0.844) | Neutral (-1.61)     | Damaging (0.041)  | Not reported                                               | NA                                                       | 7.9                                        |

*In silico* prediction of the impact and severity of mutation on protein function was performed using Polyphen-2 (8), SIFT and Provean (9), using recommended parameters. Polyphen-2 predictions were made based on the HumDiv model. <sup>a</sup>Human islet expression is based on (10) and our unpublished data (M.C.) and is given in RPKM (reads per kilobase of exon model per million mapped reads) units. <sup>b</sup>Knockout mouse model phenotype information is according to the Mouse Genome informatics (MGI) and the Wellcome Trust Sanger Institute (WTSI) databases. NA: not available.

SUPPLEMENTARY DATA

**Supplementary Figure 1. Heatmap of gene expression in human tissues.** RNAseq values (in RPKM) from the indicated human tissues were obtained from GTEx (v4.pl). RNA-seq data of FACS-purified human islet  $\beta$ -cells were from Nica et al (11). Human islet RNA-seq data (24 in total) were from Eizirik et al and Cnop et al (10; 12) (and unpublished data). Bone (osteoblast) gene expression was obtained from GEO dataset accession number GSE57925 (unpublished data). The median RPKM value of the samples is represented, with the maximum set at 30. The heatmap was made in R (function heatmap.2).

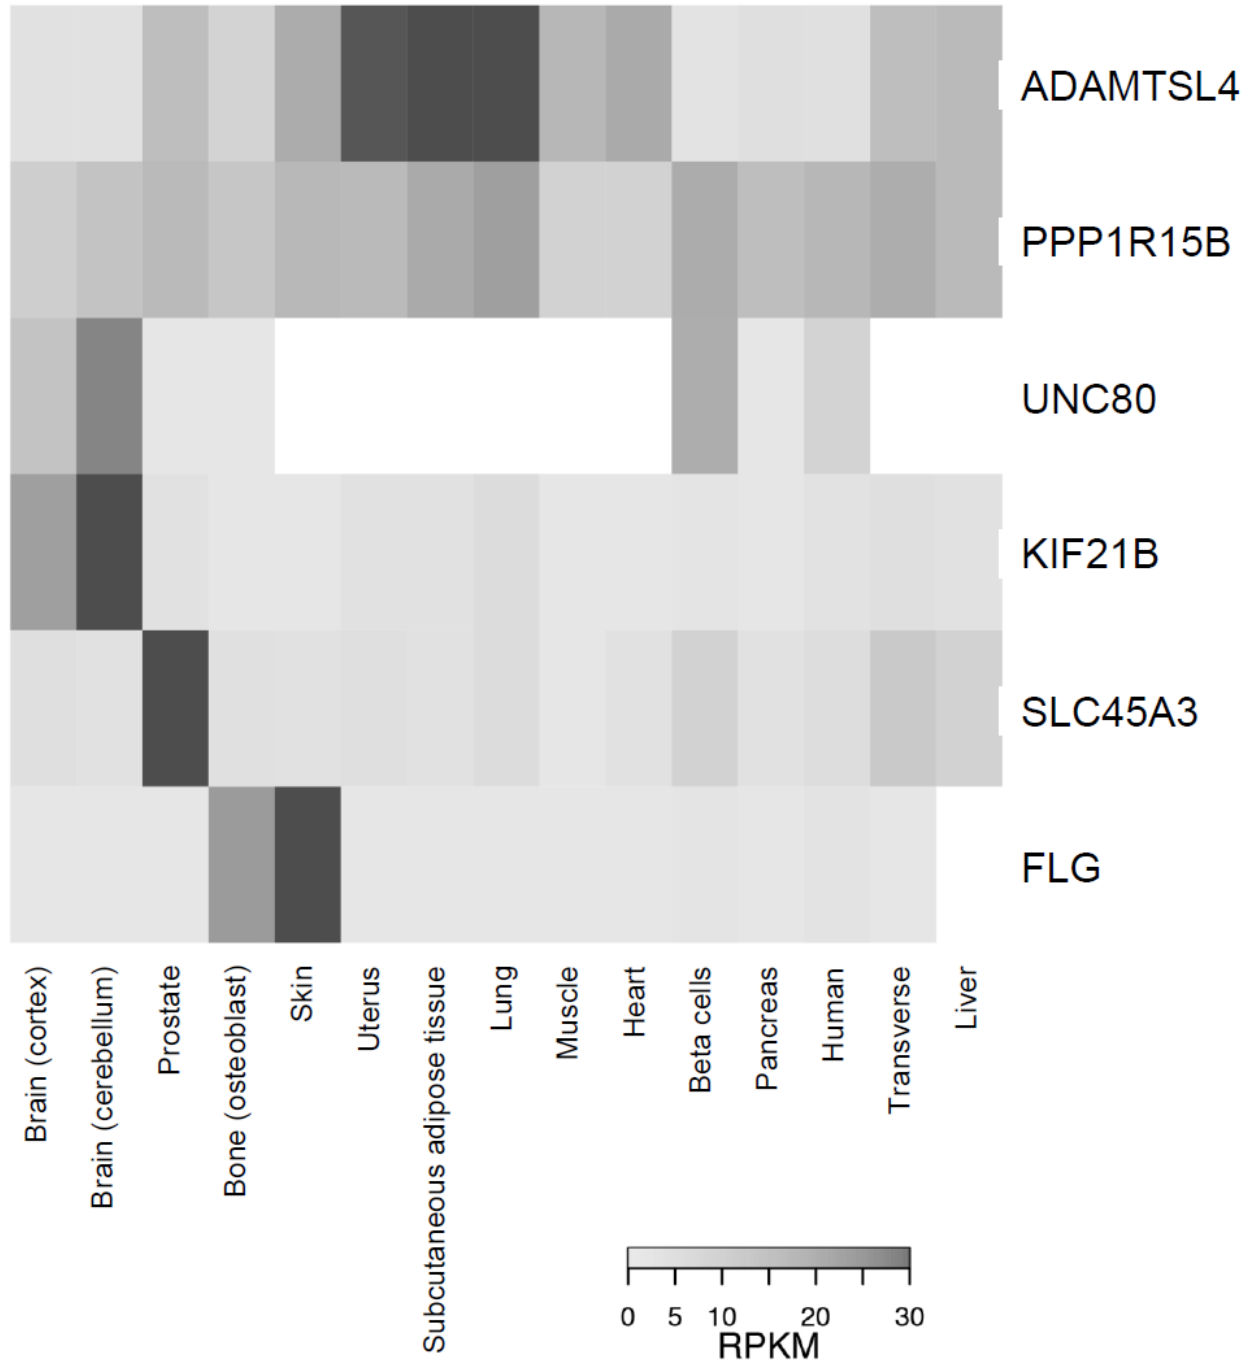

SUPPLEMENTARY DATA

**Supplementary Figure 2. PPP1R15B silencing does not modify expression of the pro-apoptotic Bim splice variants Bim-EL and Bim-L or the anti-apoptotic proteins BCL2 and BCL-XL.** INS-1E cells were transfected with control siRNA (siCT) or two different siRNAs targeting PPP1R15B (siP1R15B1 and siP1R15B2). 48h after transfection the Bim-EL and Bim-L (A, B, C) and BCL2 and BCL-XL (D, E, F) expression was examined by Western blot. A and D are representative blots of 5 experiments. B, C, E and F are densitometric quantifications of protein expression corrected for  $\alpha$ -tubulin, and expressed as fold of siCT.

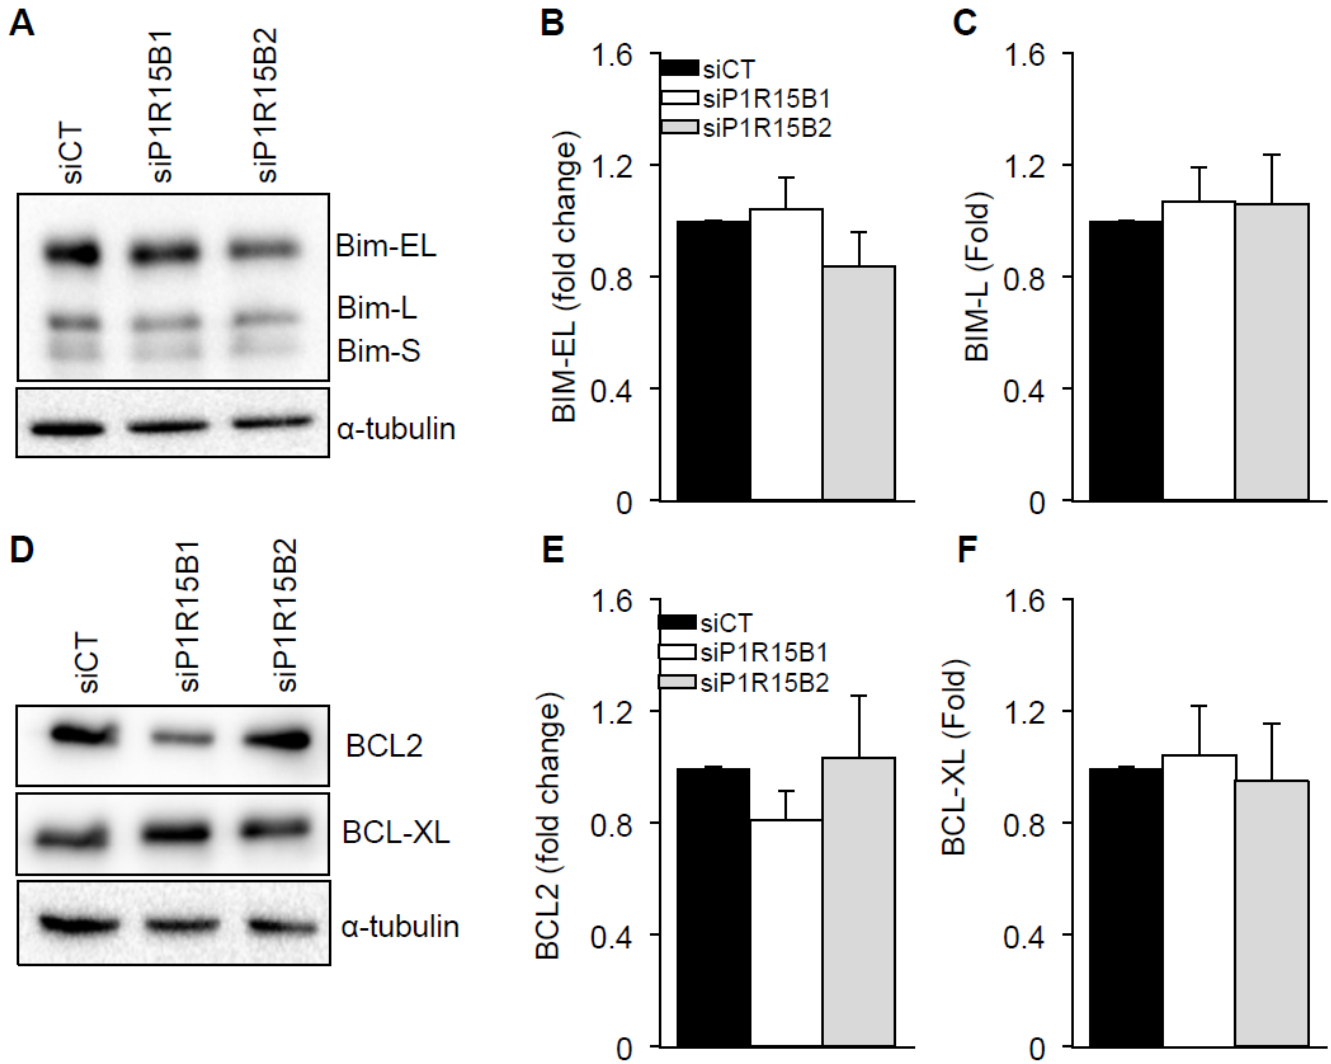

## SUPPLEMENTARY DATA

### Supplementary References

1. Jousse C, Oyadomari S, Novoa I, Lu P, Zhang Y, Harding HP, Ron D. Inhibition of a constitutive translation initiation factor 2 $\alpha$  phosphatase, CReP, promotes survival of stressed cells. *J Cell Biol* 2003;163:767-775
2. Cunha DA, Igoillo-Esteve M, Gurzov EN, Germano CM, Naamane N, Marhfour I, Fukaya M, Vanderwinden JM, Gysemans C, Mathieu C, Marselli L, Marchetti P, Harding HP, Ron D, Eizirik DL, Cnop M. Death protein 5 and p53-upregulated modulator of apoptosis mediate the endoplasmic reticulum stress-mitochondrial dialog triggering lipotoxic rodent and human  $\beta$ -cell apoptosis. *Diabetes* 2012;61:2763-2775
3. Gurzov EN, Germano CM, Cunha DA, Ortis F, Vanderwinden JM, Marchetti P, Zhang L, Eizirik DL. p53 up-regulated modulator of apoptosis (PUMA) activation contributes to pancreatic beta-cell apoptosis induced by proinflammatory cytokines and endoplasmic reticulum stress. *J Biol Chem* 2010;285:19910-19920
4. Harding HP, Zhang Y, Scheuner D, Chen JJ, Kaufman RJ, Ron D. Ppp1r15 gene knockout reveals an essential role for translation initiation factor 2 alpha (eIF2alpha) dephosphorylation in mammalian development. *Proc Natl Acad Sci U S A* 2009;106:1832-1837
5. Ahram D, Sato TS, Kohilan A, Tayeh M, Chen S, Leal S, Al-Salem M, El-Shanti H. A homozygous mutation in ADAMTSL4 causes autosomal-recessive isolated ectopia lentis. *Am J Hum Genet* 2009;84:274-278
6. Palmer CN, Irvine AD, Terron-Kwiatkowski A, Zhao Y, Liao H, Lee SP, Goudie DR, Sandilands A, Campbell LE, Smith FJ, O'Regan GM, Watson RM, Cecil JE, Bale SJ, Compton JG, DiGiovanna JJ, Fleckman P, Lewis-Jones S, Arseculeratne G, Sergeant A, Munro CS, El HB, McElreavey K, Halkjaer LB, Bisgaard H, Mukhopadhyay S, McLean WH. Common loss-of-function variants of the epidermal barrier protein filaggrin are a major predisposing factor for atopic dermatitis. *Nat Genet* 2006;38:441-446
7. Kypriotou M, Boechat C, Huber M, Hohl D. Spontaneous atopic dermatitis-like symptoms in a/a ma ft/ma ft/J flaky tail mice appear early after birth. *PLoS One* 2013;8:e67869
8. Adzhubei IA, Schmidt S, Peshkin L, Ramensky VE, Gerasimova A, Bork P, Kondrashov AS, Sunyaev SR. A method and server for predicting damaging missense mutations. *Nat Methods* 2010;7:248-249
9. Choi Y, Sims GE, Murphy S, Miller JR, Chan AP. Predicting the functional effect of amino acid substitutions and indels. *PLoS One* 2012;7:e46688
10. Cnop M, Abdulkarim B, Bottu G, Cunha DA, Igoillo-Esteve M, Masini M, Turatsinze JV, Griebel T, Villate O, Santin I, Bugliani M, Ladriere L, Marselli L, McCarthy MI, Marchetti P, Sammeth M, Eizirik DL. RNA sequencing identifies dysregulation of the human pancreatic islet transcriptome by the saturated fatty acid palmitate. *Diabetes* 2014;63:1978-1993
11. Nica AC, Ongen H, Irminger JC, Bosco D, Berney T, Antonarakis SE, Halban PA, Dermitzakis ET. Cell-type, allelic, and genetic signatures in the human pancreatic beta cell transcriptome. *Genome Res* 2013;23:1554-1562
12. Eizirik DL, Sammeth M, Bouckenoghe T, Bottu G, Sisino G, Igoillo-Esteve M, Ortis F, Santin I, Colli ML, Barthson J, Bouwens L, Hughes L, Gregory L, Lunter G, Marselli L, Marchetti P, McCarthy MI, Cnop M. The human pancreatic islet transcriptome: expression of candidate genes for type 1 diabetes and the impact of pro-inflammatory cytokines. *PLoS Genet* 2012;8:e1002552
